# Supplementary material for: A deep eutectic solvent-based semi-interpenetrating polymer electrolyte for high-voltage stable lithium-metal batteries
Source: Royal Society of Chemistry journal article supplement (doi:10.1039/d5ta00020c), 2025-01-01
Supplement: d5ta00020c1.pdf [file d5ta00020c1.pdf]

## **Deep eutectic solvent-based semi-interpenetrating polymer electrolyte for high-voltage stable lithium-metal batteries**

Tianhui Cheng,<sup>a</sup> Weixing Min,<sup>a</sup> Mingli Wang,<sup>b</sup> Shuangshuang Zhu,<sup>a</sup> Lengwan Li,<sup>b</sup>  
Shilun Gao,<sup>c</sup> Zhenxi Li,<sup>a</sup> Jia Tian,<sup>b</sup> Dandan Yang,<sup>d</sup> Huabin Yang<sup>\*a, e</sup> and Peng-Fei  
Cao<sup>\*b</sup>

*<sup>a</sup>Institute of New Energy Material Chemistry, School of Materials Science and Engineering,  
Nankai University, Tianjin 300350, China.*

*<sup>b</sup>State Key Laboratory of Organic-Inorganic Composites, Beijing University of Chemical  
Technology, Beijing 100029, China.*

*<sup>c</sup>School of Integrated Circuit Science and Engineering, Tianjin University of Technology,  
Tianjin 300384, China.*

*<sup>d</sup>Experimental Teaching Center of Materials Science, School of Materials Science and  
Engineering, Nankai University, Tianjin 300350, China.*

*<sup>e</sup>Tianjin Key Laboratory of Metal and Molecular Based Material Chemistry, School of  
Materials Science and Engineering, Nankai University, Tianjin 300350, China.*

*Corresponding authors:*

*Huabin Yang: [hb\\_yang@nankai.edu.cn](mailto:hb_yang@nankai.edu.cn)*

*Peng-Fei Cao: [caopf@buct.edu.cn](mailto:caopf@buct.edu.cn)*

## Experimental section

### Electrochemical Characterization

Linear-sweep voltammetry was carried out using Li||SS symmetric cells from 2.5 to 5.2 V vs Li/Li<sup>+</sup> at a scan rate of 1 mV s<sup>-1</sup>.

The ionic conductivity ( $\sigma$ ) is calculated based on the equation:

$$\sigma = \frac{L}{RS} \quad (1)$$

where L (cm) is the thickness of the composites and separator, R ( $\Omega$ ) is the ohmic resistance and S (cm<sup>2</sup>) is the contact area, respectively.

The  $t_{Li^+}$  was examined by combining AC impedance and direct-current (DC) polarization methods in a Li//Li symmetric cell, and the value can be calculated according to the Bruce-Vincent-Evans equation:<sup>1, 2</sup>

$$t_{Li^+} = \frac{I_s(\Delta V - I_0 R_0)}{I_0(\Delta V - I_s R_s)} \quad (2)$$

where  $\Delta V$  represents the applied DC polarization voltage with a value of 10 mV.  $I_0$  and  $I_s$  are the direct current before and after polarization.  $R_0$  and  $R_s$  represent the initial and final charge-transfer impedance of the polarization process.

The activation energies were calculated by fitting the conductivity data using the VFT equation:

$$\sigma = A \exp\left(-\frac{E_a}{k_b T}\right) \quad (3)$$

where  $E_a$  is the activation energy, A is the pre-exponential factor,  $k_b$  is the Boltzmann constant and T is the absolute temperature.

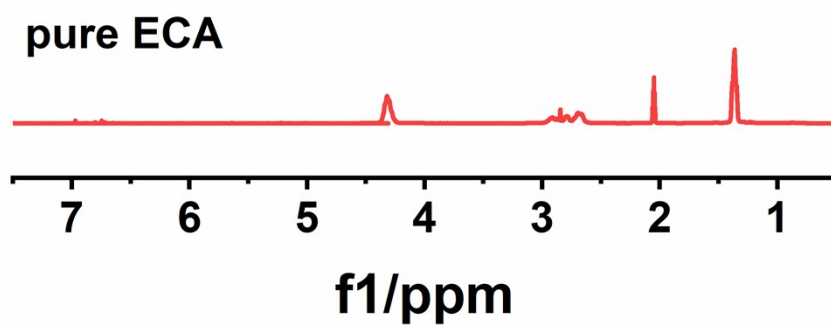

Figure S1.  $^1\text{H}$  NMR spectra of pure ECA in deuterated acetone. When ECA was introduced in deuterated acetone, the C=C bonds disappeared, demonstrating the anionic polymerization caused by the trace amount of water.

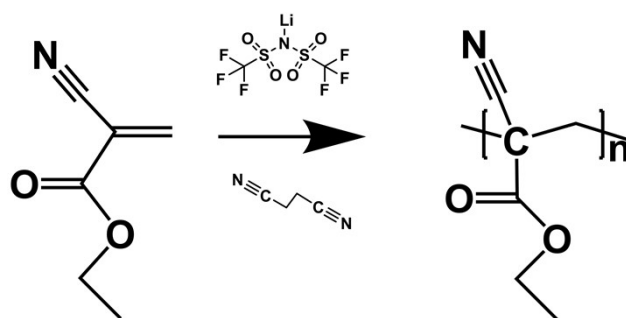

Figure S2. The polymerization process of ECA in DES.

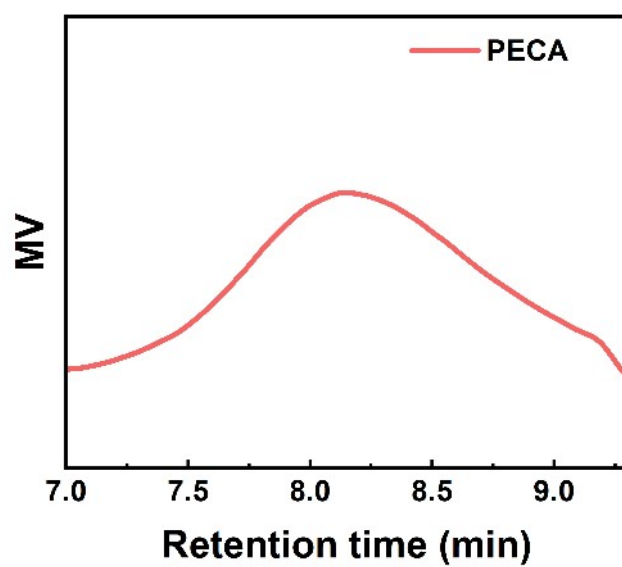

**Figure S3.** The comparative GPC curves of PECA obtained from DES-PECA.

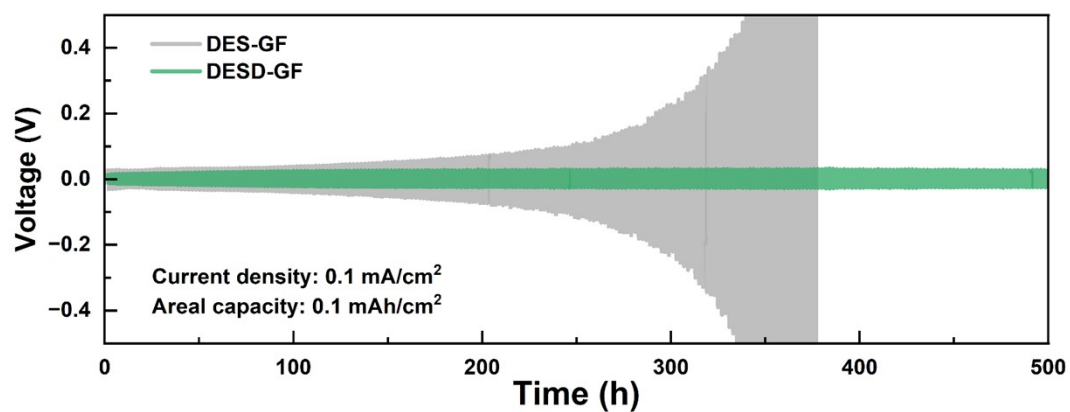

Figure S4. Cycling performance of Li/DES-GF/Li and Li/DESD-GF/Li symmetric cell at a current density of  $0.1 \text{ mA cm}^{-2}$  with a fixed capacity of  $0.1 \text{ mAh cm}^{-2}$ .

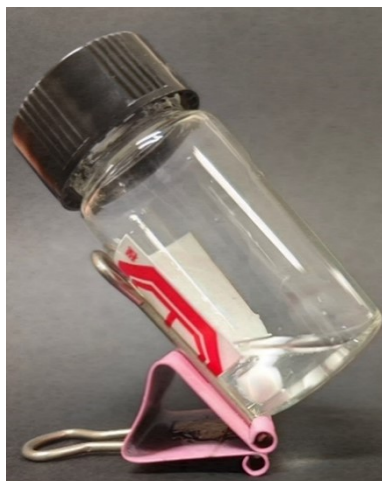

Figure S5. The digital image of the DESD electrolyte.

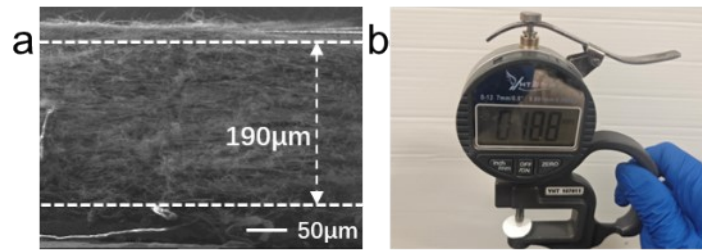

Figure S6. The thickness of glass fiber is measured by SEM (a) and micrometer (b).

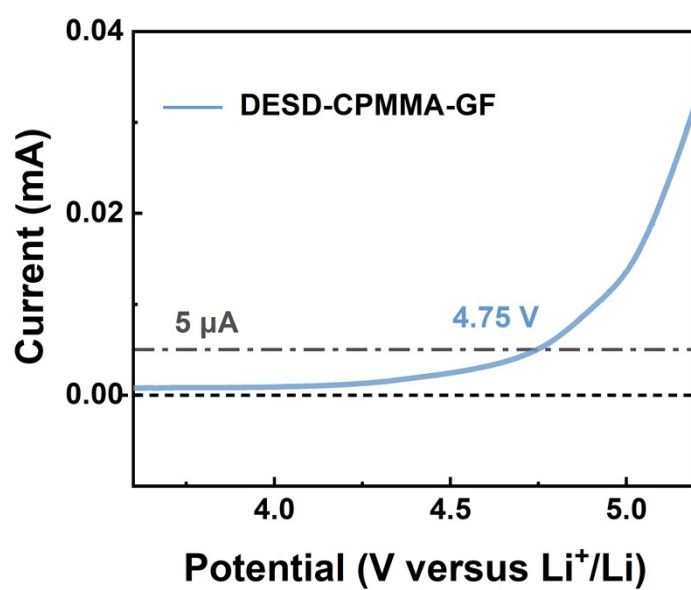

Figure S7. LSVs of the DESD-CPMMA-GF electrolyte at a scan rate of 0.1 mVs<sup>-1</sup> from 3.6-5.2 V.

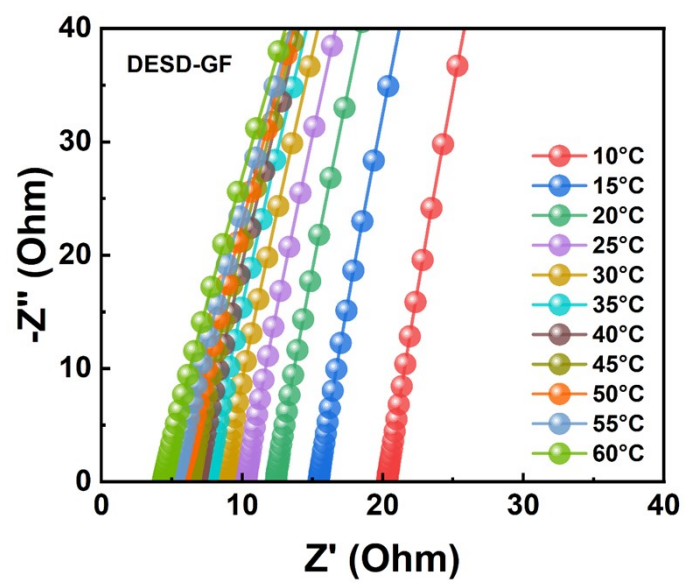

Figure S8. The EIS curves of DESD-GF electrolyte from 10 °C to 60 °C.

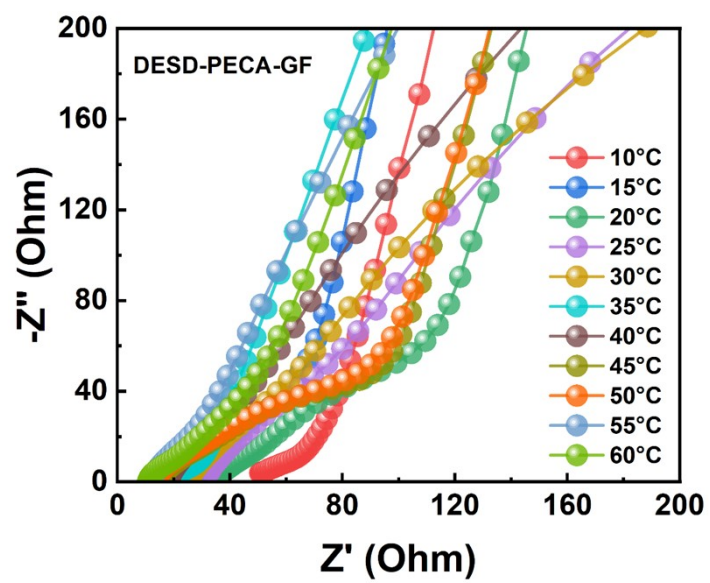

Figure S9. The EIS curves of the DESD-PECA-GF electrolyte recorded across the temperature range of 10 °C to 60 °C.

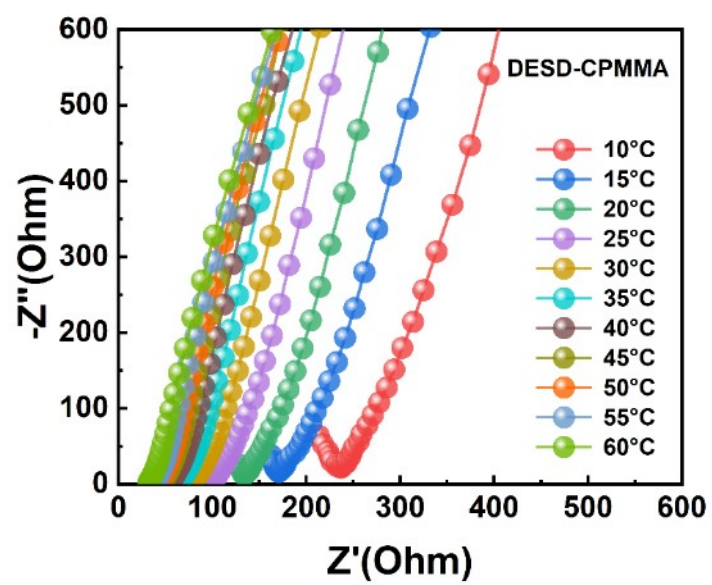

Figure S10. EIS curves of DESD-CPMMA-GF electrolyte from 10 °C to 60 °C.

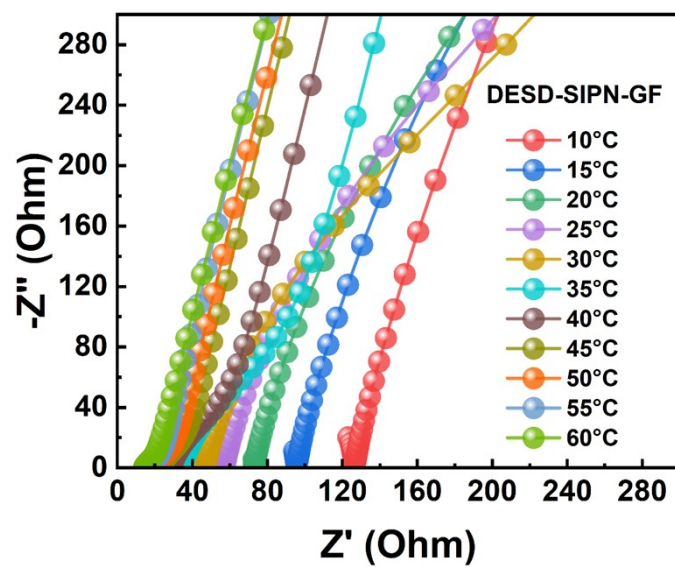

Figure S11. EIS curves of DESD-SIPN-GF electrolyte from 10 °C to 60 °C.

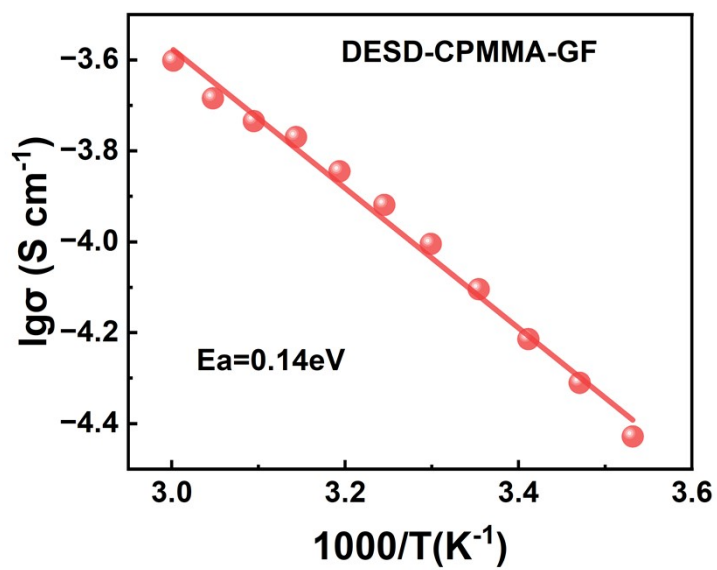

Figure S12. Ionic conductivities of the DESD-CPMMA-GF electrolyte as a function of temperature.

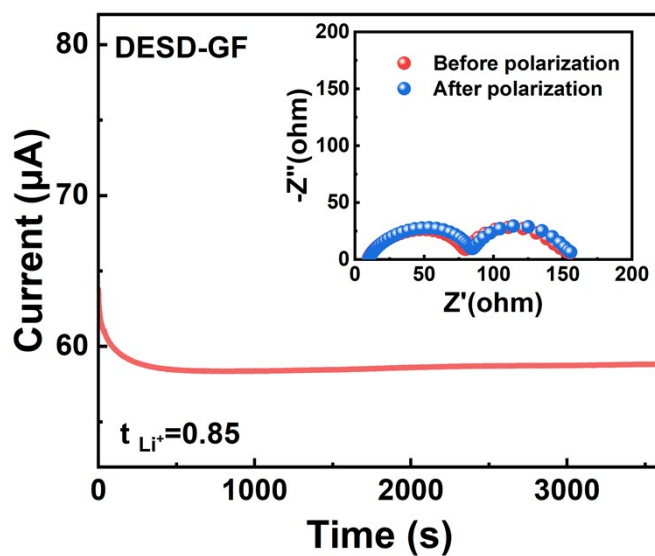

Figure S13. Chronoamperometry profile of Li/DESD-GF/Li symmetric cell under a polarization voltage of 10 mV. The inset is corresponding electrochemical impedance spectroscopy (EIS) spectra before and after polarization.

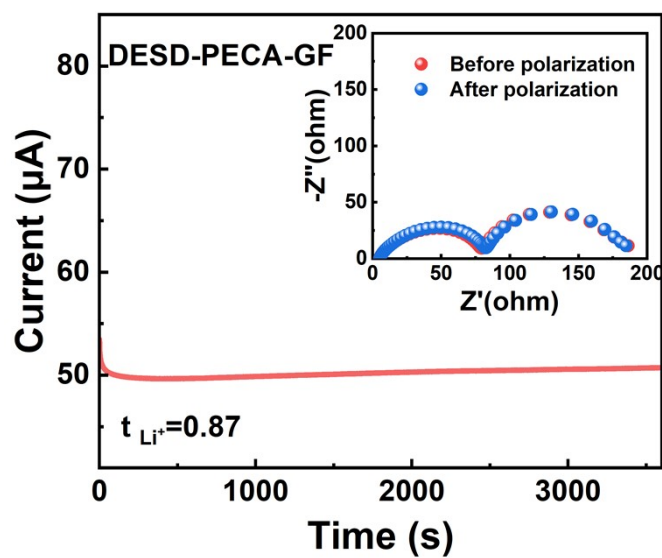

Figure S14. Chronoamperometry profile of Li/DESD-PECA-GF/Li symmetric cell under a polarization voltage of 10 mV. The inset is corresponding electrochemical impedance spectroscopy (EIS) spectra before and after polarization.

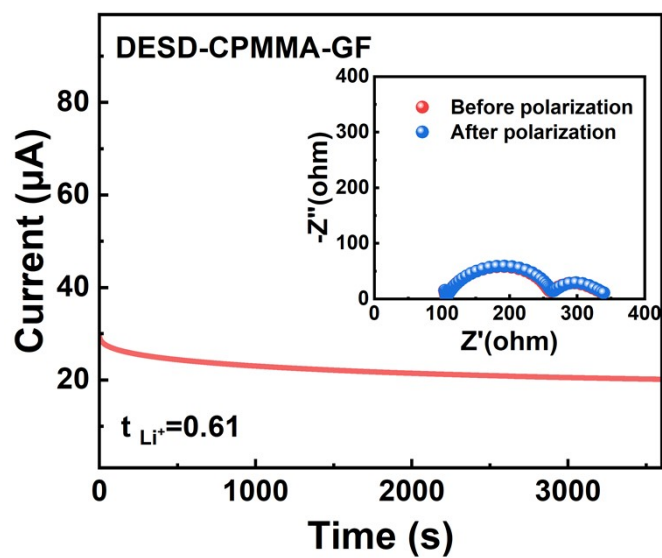

Figure S15. Chronoamperometry profile of Li/DESD-CPMMA-GF/Li symmetric cells under a polarization voltage of 10 mV. The inset is corresponding electrochemical impedance spectroscopy (EIS) spectra before and after polarization.

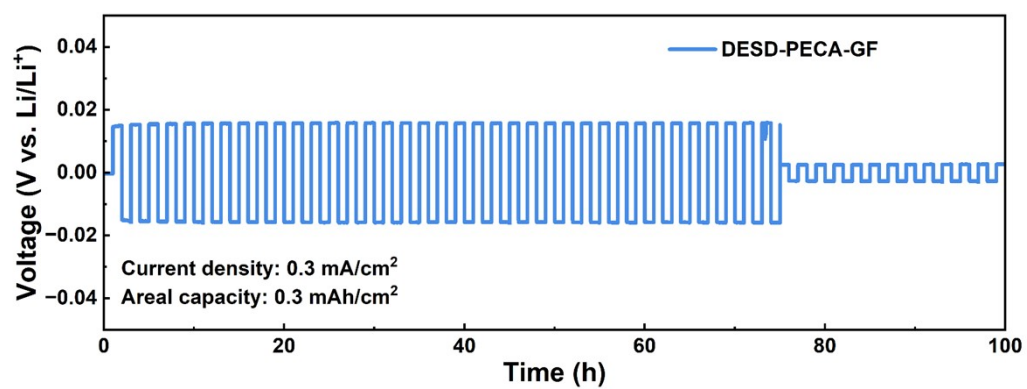

Figure S16. The enlarged Figure 3d of Li/DESD-PECA-GF/Li symmetric cell at 0.3 mA cm<sup>-2</sup> with a fixed capacity of 0.3 mA h cm<sup>-2</sup>.

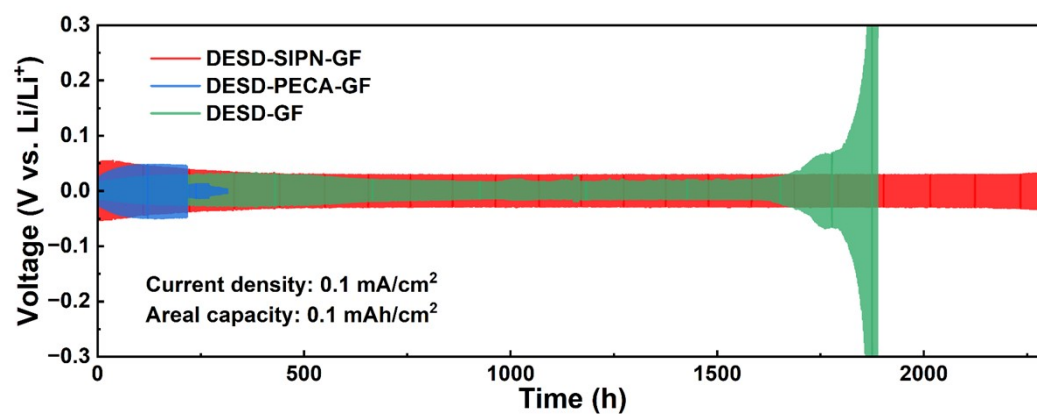

Figure S17. Cycling performance of symmetric cells at the current density of 0.1 mA cm<sup>-2</sup> with capacity of 0.1 mAh cm<sup>-2</sup>.

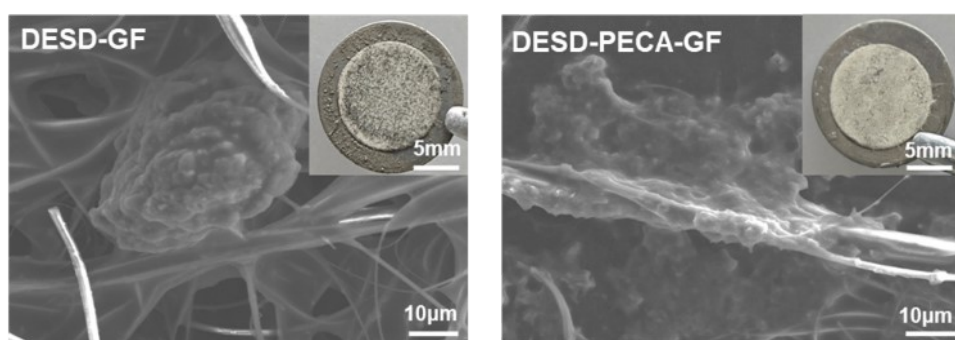

Figure S18. The SEM images of the morphologies of Li foils cycled in Li/DESD-GF/Li and Li/DESD-PECA-GF/Li symmetric cells after 200 h at  $0.3 \text{ mA cm}^{-2}$ . The inset is the photograph of the cycled Li foils.

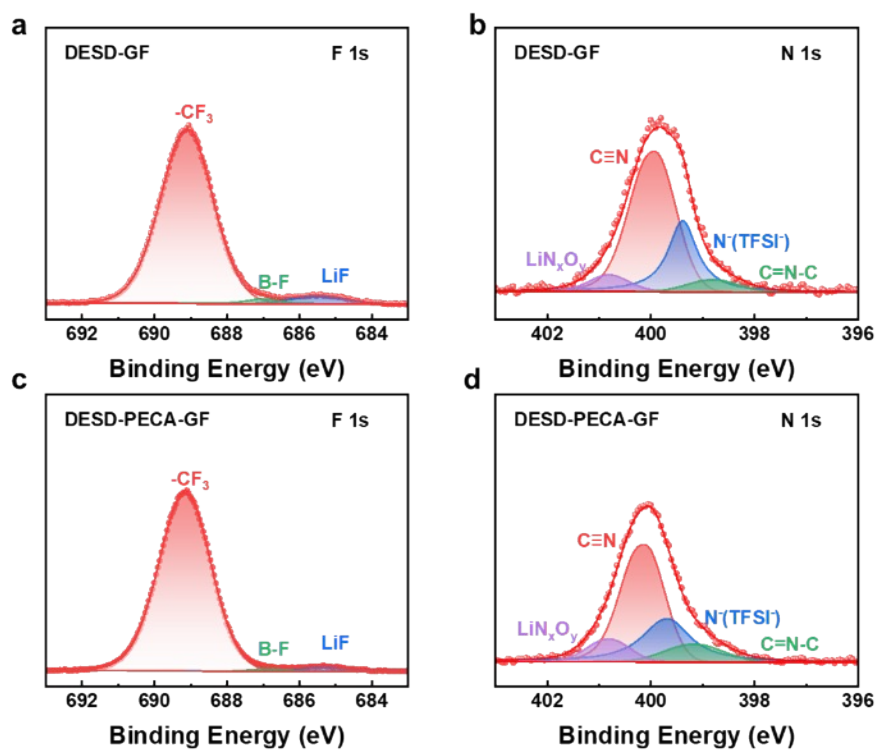

Figure S19. XPS spectra of Li/DESD-GF/Li and Li/DESD-PECA-GF/Li symmetric cells: F 1s spectra of (a) Li/DESD-GF/Li and (c) Li/DESD-PECA-GF/Li; N 1s spectra of (b) Li/DESD-GF/Li and (d) Li/DESD-PECA-GF/Li.

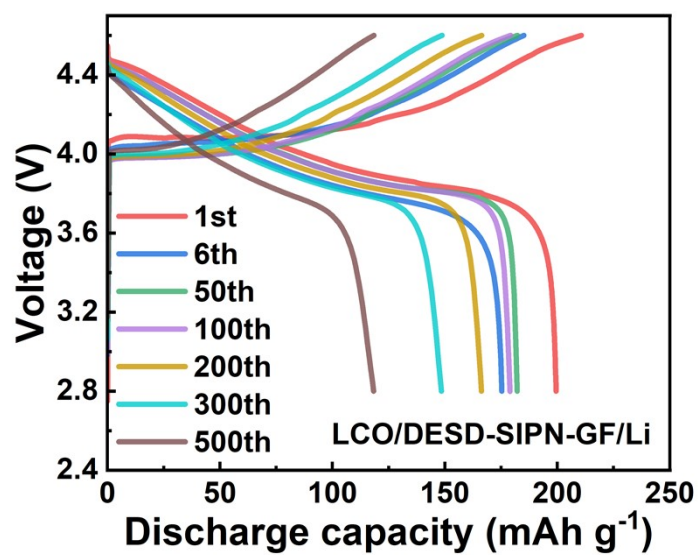

Figure S20. Charge-discharge voltage profiles of LCO/DESD-SIPN-GF/Li full cell at 1 C and 4.6 V.

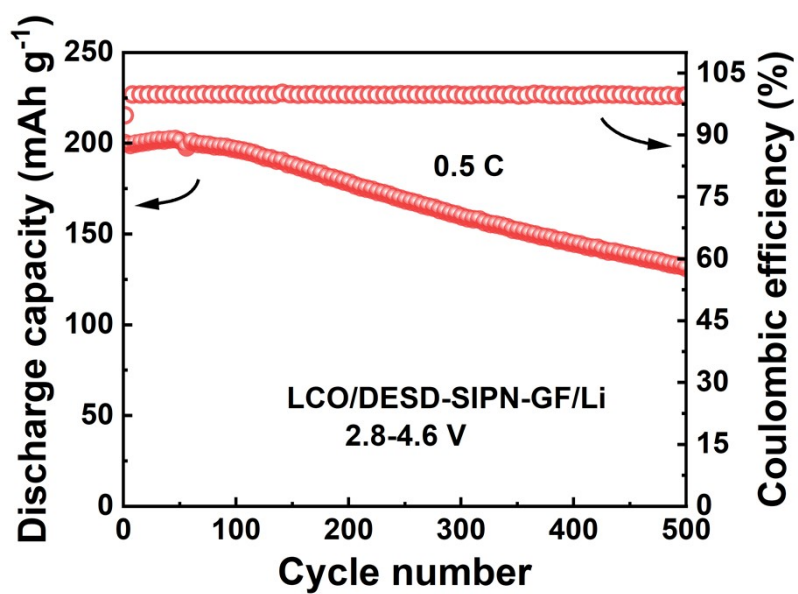

Figure S21. Electrochemical performance of LCO/DESD-SIPN-GF/Li full cell at a current density of 0.5 C and 4.6V.

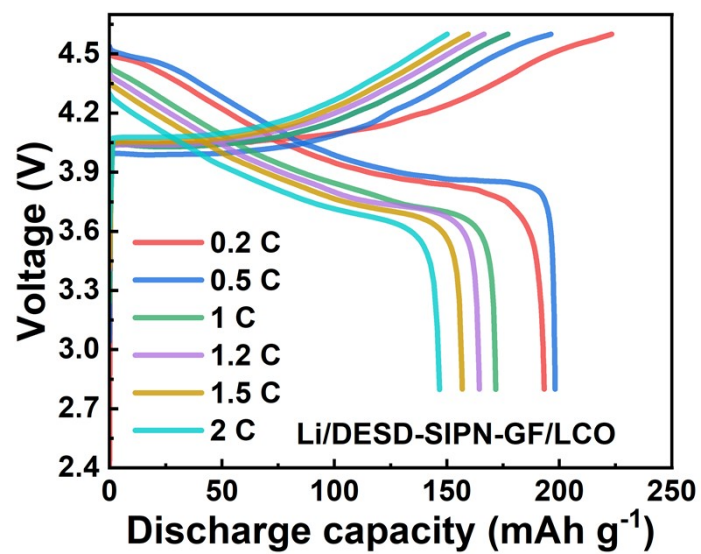

Figure S22. Galvanostatic charge/discharge voltage profiles of LCO/DESD-SIPN-GF/Li at different current density and 4.6 V.

Table S1. The GPC results of PECA.

| Product | $M_n$ | $M_w$ | PDI  |
|---------|-------|-------|------|
| PECA    | 10905 | 21310 | 1.95 |

Table S2. The detailed values of the current, impedance and voltage for calculating the  $t_{Li^+}$  of DESD-GF, DESD-PECA-GF, DESD-CPMMA-GF and DESD-SIPN-GF.

| Electrolyte   |    | $I_0$ (mA) | $I_s$ (mA) | $R_0$ ( $\Omega$ ) | $R_s$ ( $\Omega$ ) | $\Delta V$ (V) | $t_{Li^+}$ |
|---------------|----|------------|------------|--------------------|--------------------|----------------|------------|
| DESD-GF       | #1 | 0.06378    | 0.05883    | 76.78              | 75.78              | 10             | 0.85       |
|               | #2 | 0.05930    | 0.05670    | 83.46              | 77.65              | 10             | 0.86       |
| DESD-PECA-GF  | #1 | 0.05346    | 0.05073    | 109.9              | 108                | 10             | 0.87       |
|               | #2 | 0.06044    | 0.05821    | 86.46              | 82.29              | 10             | 0.88       |
| DESD-CPMMA-GF | #1 | 0.02949    | 0.02017    | 91.45              | 92.13              | 10             | 0.61       |
|               | #2 | 0.02745    | 0.01963    | 99.18              | 96.22              | 10             | 0.64       |
| DESD-SIPN-GF  | #1 | 0.03789    | 0.03461    | 127.3              | 124.8              | 10             | 0.83       |
|               | #2 | 0.03840    | 0.03460    | 122                | 117                | 10             | 0.80       |

Table S3. The details of the polymer electrolyte from previous literatures cited in the Figure 5e, and the comparative electrochemical performance of those electrolytes with current work (DESD-SIPN-GF).

| Electrolyte (Ref)                          | Separator          | Rate (C) | Cycle number<br>(cycles) | Voltage<br>range (V) | Capacity<br>retention |
|--------------------------------------------|--------------------|----------|--------------------------|----------------------|-----------------------|
| This work                                  | Glass fiber        | 1C       | 500                      | 2.8-4.3              | 79%                   |
|                                            |                    | 1C       | 400                      | 2.8-4.5              | 71%                   |
|                                            |                    | 2C       | 600                      | 2.8-4.7              | 60%                   |
| SPCE-LE <sup>ref.49</sup>                  | Cellulose membrane | 0.3C     | 100                      | 3.0-4.2              | 77.7%                 |
| PEO <sup>ref.50</sup>                      | PE separator       | 0.5C     | 300                      | 2.8-4.3              | 10%                   |
| dmlSPE <sup>ref.48</sup>                   | Glass fiber        | 0.2C     | 400                      | 2.8-4.3              | 67%                   |
| SPE <sup>ref.48</sup>                      | Glass fiber        | 0.2C     | 69                       | 2.8-4.3              | 21%                   |
| QSPE2 <sup>ref.47</sup>                    | Glass fiber        | 0.2C     | 400                      | 3-4.3                | 19%                   |
| PDDA-TFSI <sup>ref.42</sup><br>DFMA-co-MMA | Glass fiber        | 0.5C     | 300                      | 2.7-4.3              | 71.9%                 |
| 70PSA <sup>ref.45</sup>                    | PP separator       | 0.5C     | 200                      | 2.8-4.5              | 71%                   |
| PVDF <sup>ref.43</sup>                     | PP separator       | 0.2C     | 100                      | 2.5-4.5              | 51%                   |
| PI <sup>ref.43</sup>                       | PP separator       | 0.2C     | 100                      | 2.5-4.5              | 54%                   |
| p-BA <sup>ref.44</sup>                     | Glass fiber        | 1C       | 200                      | 3.0-4.7              | 40%                   |
| p-ICA <sup>ref.44</sup>                    | Glass fiber        | 1C       | 200                      | 3.0-4.7              | 25%                   |
| LiFSI-EMC/FEC <sup>ref.46</sup>            | PE separator       | 0.5C     | 300                      | 3.0-4.7              | 67%                   |

## Notes and references

1. D. Zhang, Y. Liu, Z. Sun, Z. Liu, X. Xu, L. Xi, S. Ji, M. Zhu and J. Liu, *Angew. Chem. Int. Ed.*, 2023, **62**, e202310006.
2. D. Zhang, Y. Liu, S. Yang, J. Zhu, H. Hong, S. Li, Q. Xiong, Z. Huang, S. Wang, J. Liu and C. Zhi, *Adv. Mater.* 2024, **36**, 2401549.
